# Supplementary material
Source: PubMed Central journal article supplement (PMC6286326)

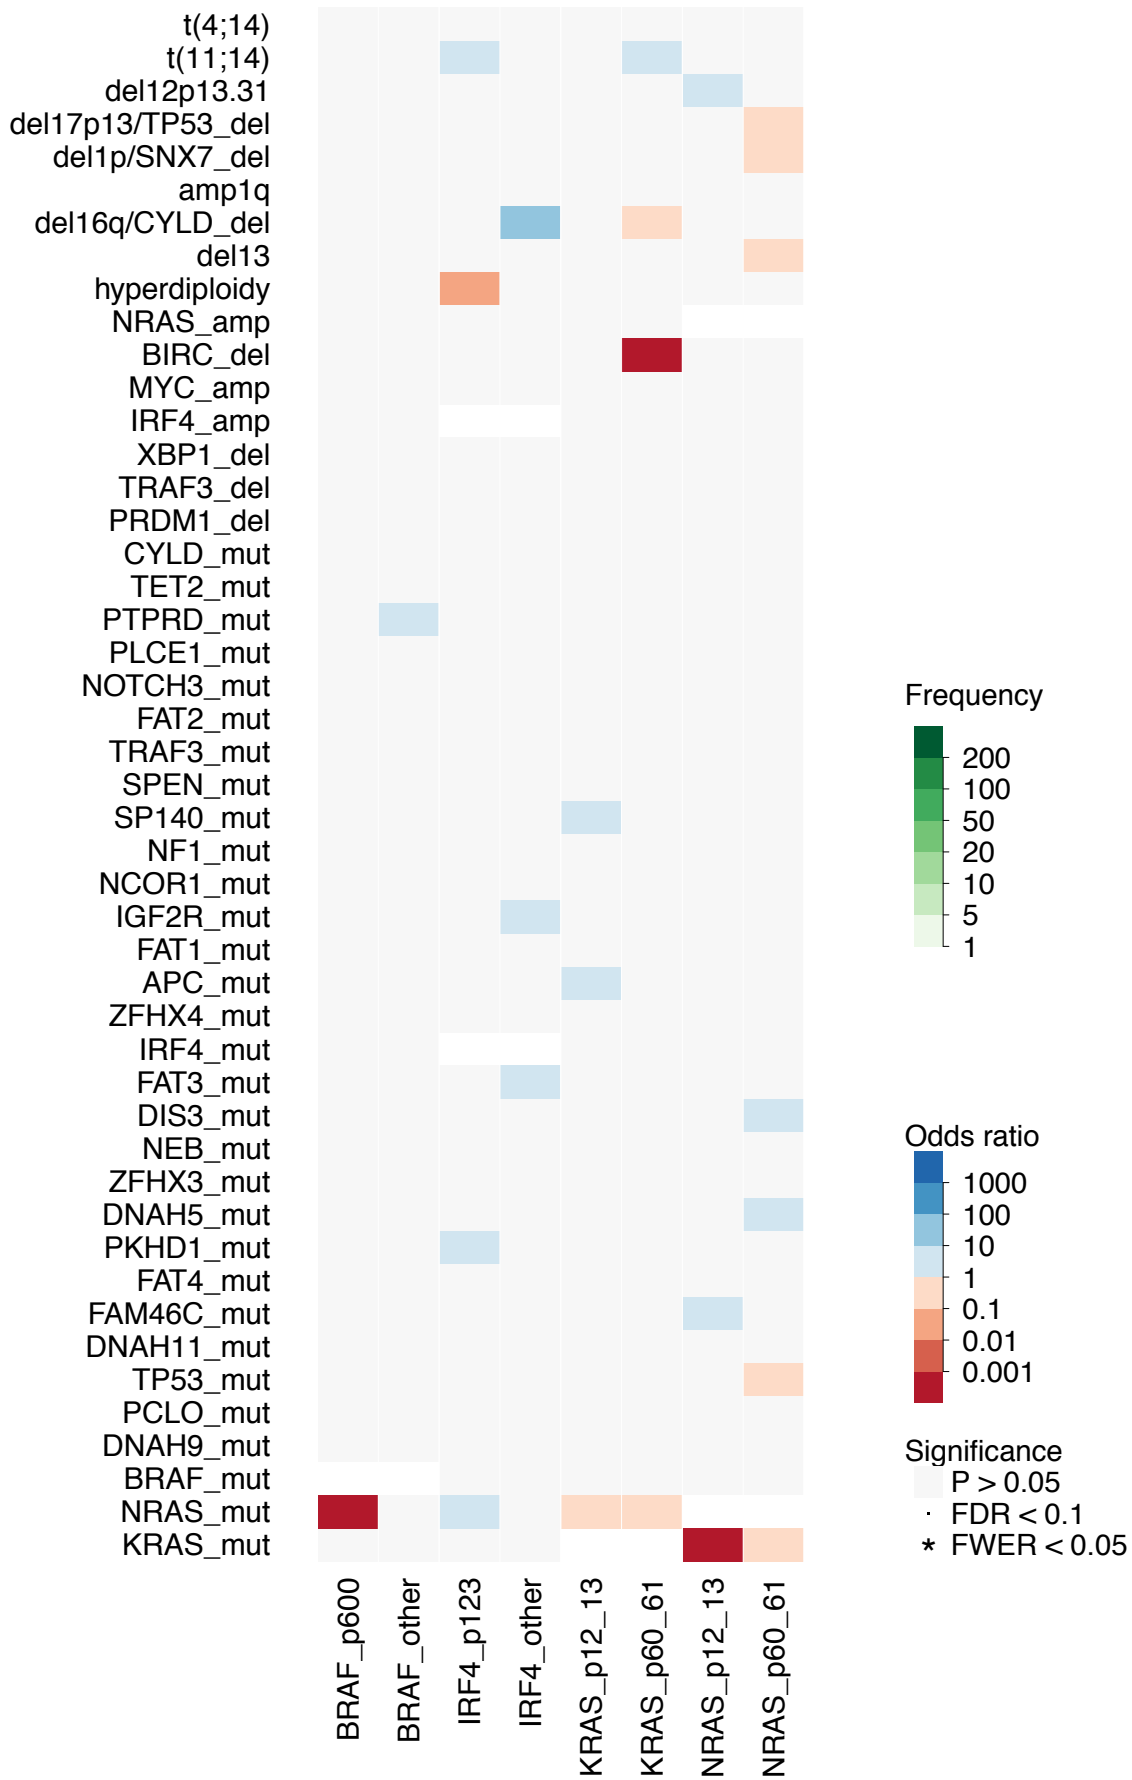

Supplementary Figure 11

Supplement: 41375_2018_37_MOESM12_ESM.pdf [file 41375_2018_37_MOESM12_ESM.pdf]

**Ai**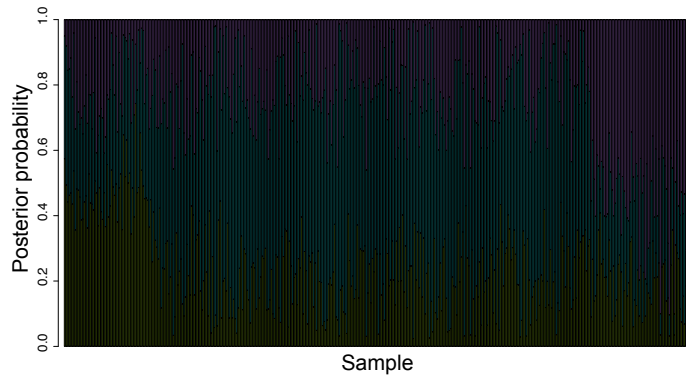**Aii**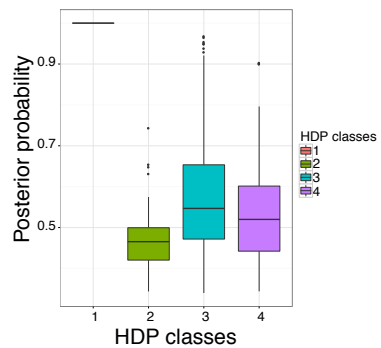**Aiii**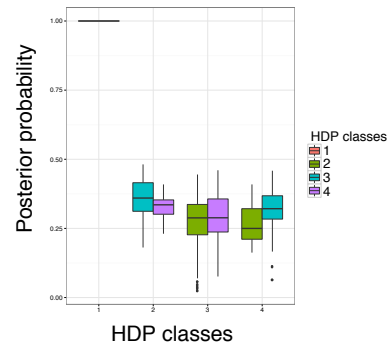**B****Signature HDP 2**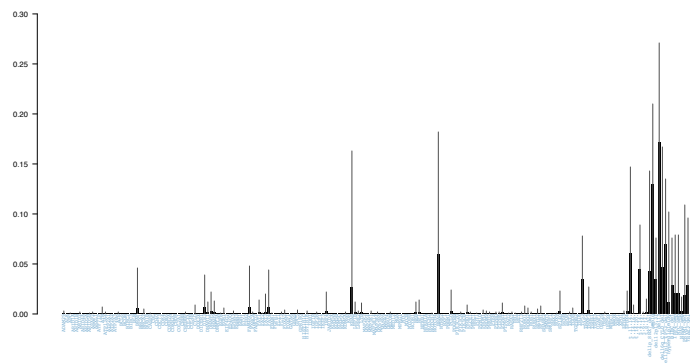**Signature HDP 3**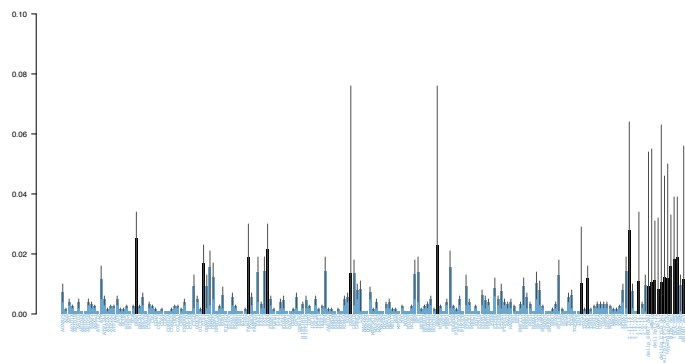**Signature HDP 4**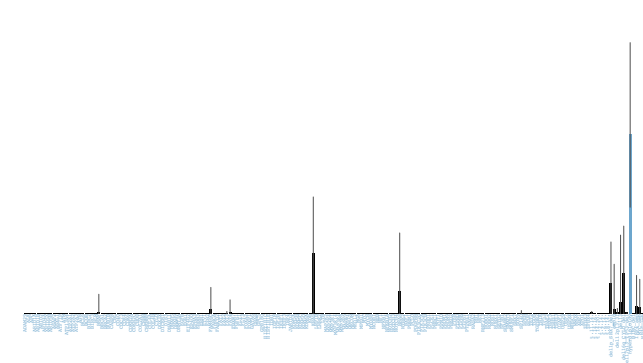**C**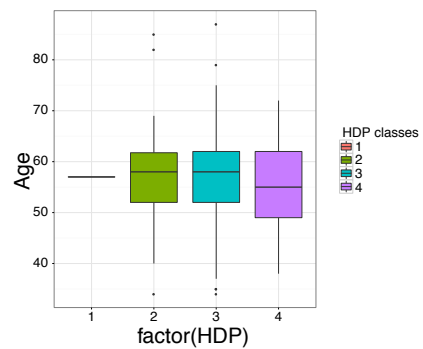

Supplement: 41375_2018_37_MOESM13_ESM.pdf [file 41375_2018_37_MOESM13_ESM.pdf]

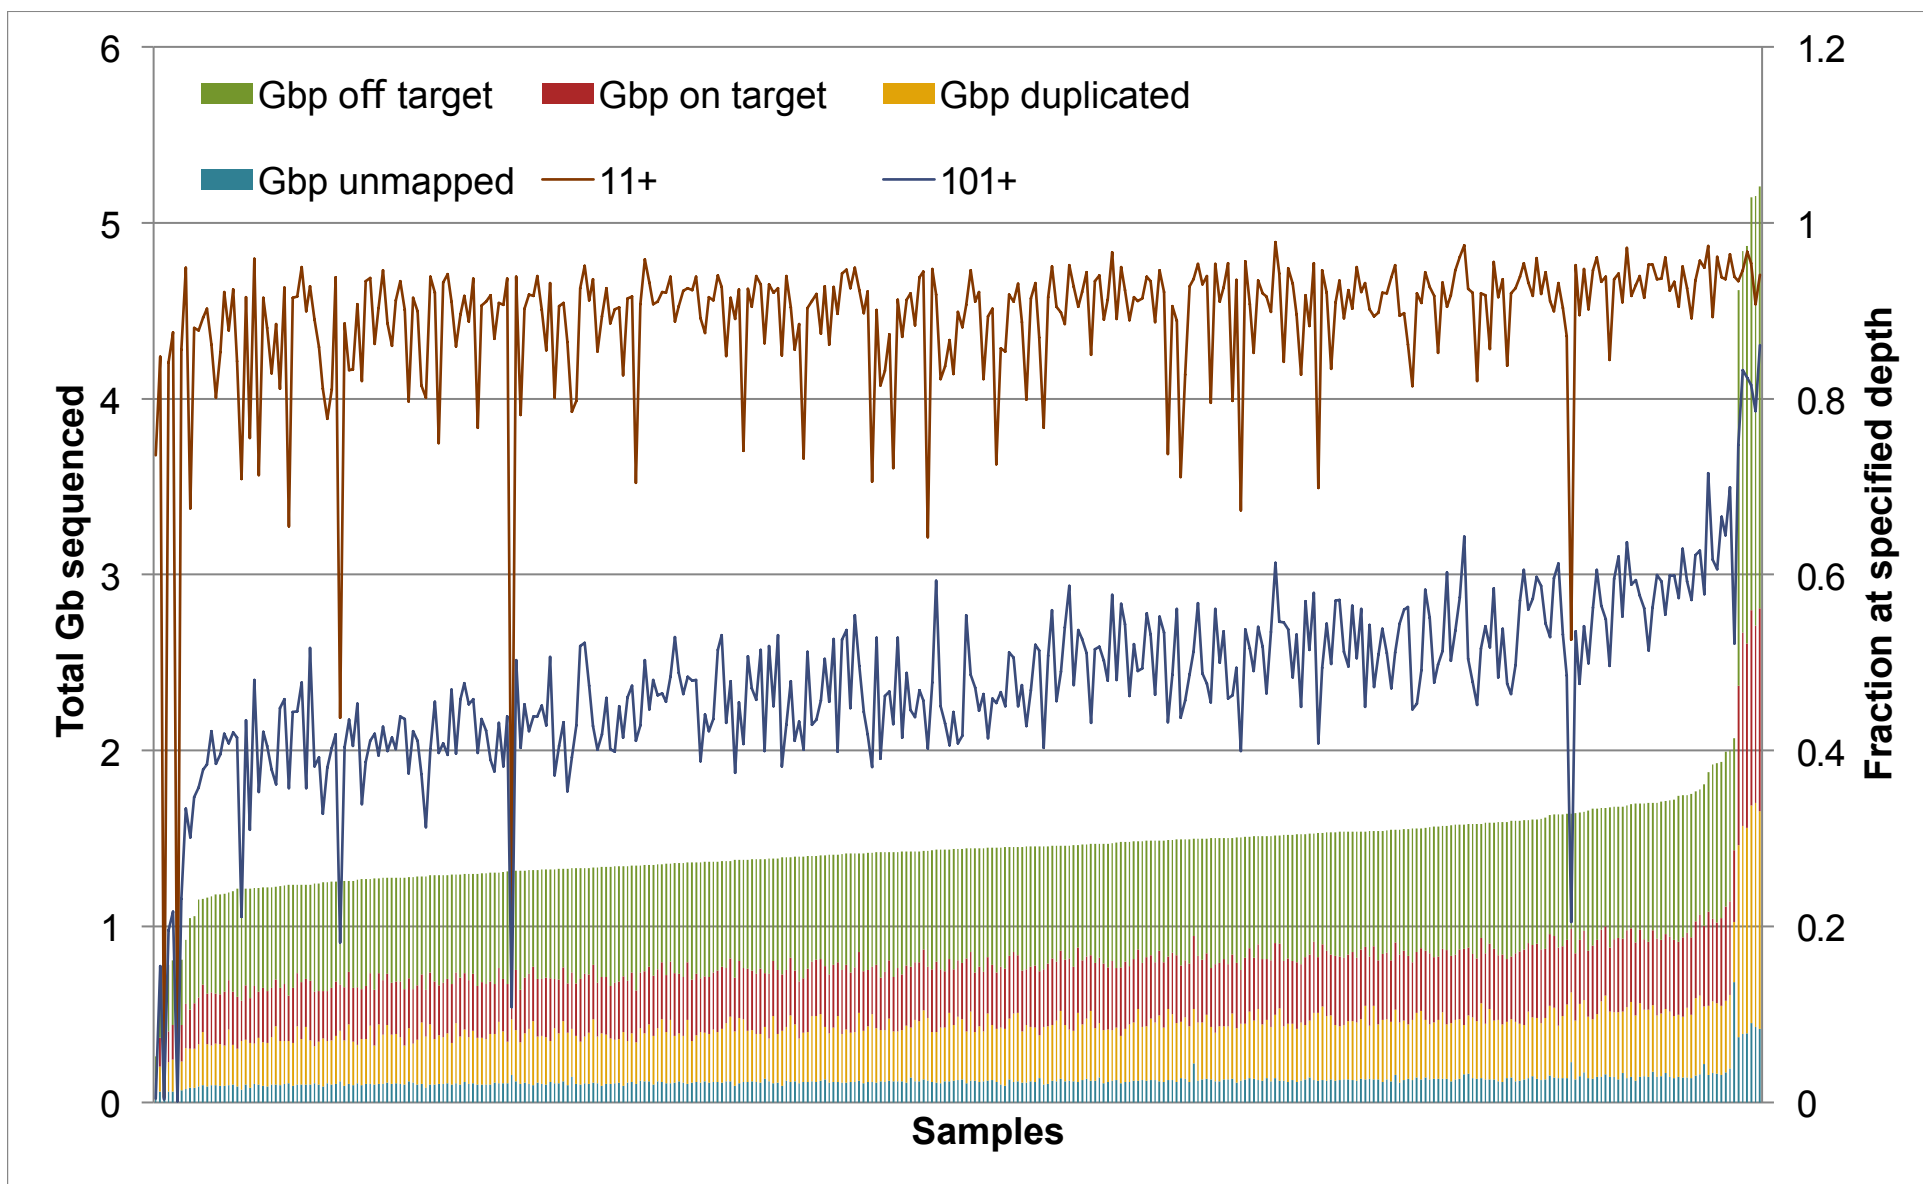

Supplementary Figure 1

Supplement: 41375_2018_37_MOESM2_ESM.pdf [file 41375_2018_37_MOESM2_ESM.pdf]

# SUPPLEMENTARY FIGURE 2

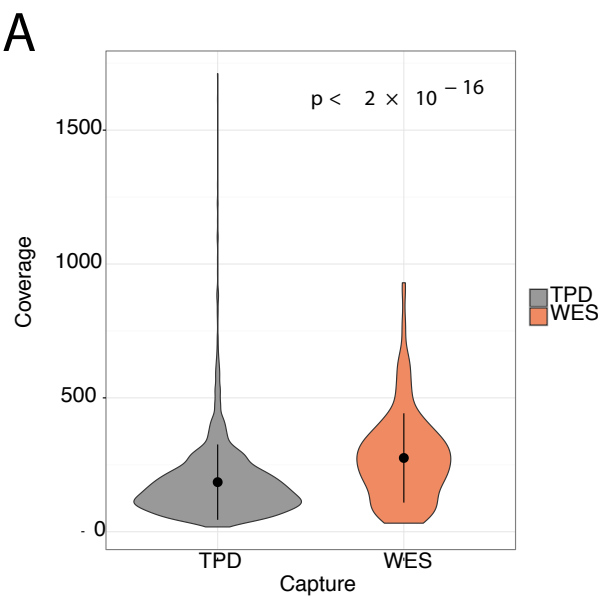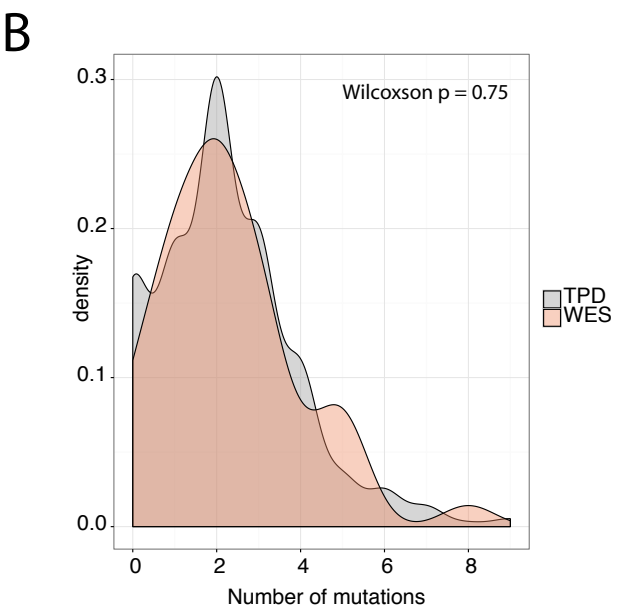

Supplement: 41375_2018_37_MOESM3_ESM.pdf [file 41375_2018_37_MOESM3_ESM.pdf]

# SUPPLEMENTARY FIGURE 3

## A

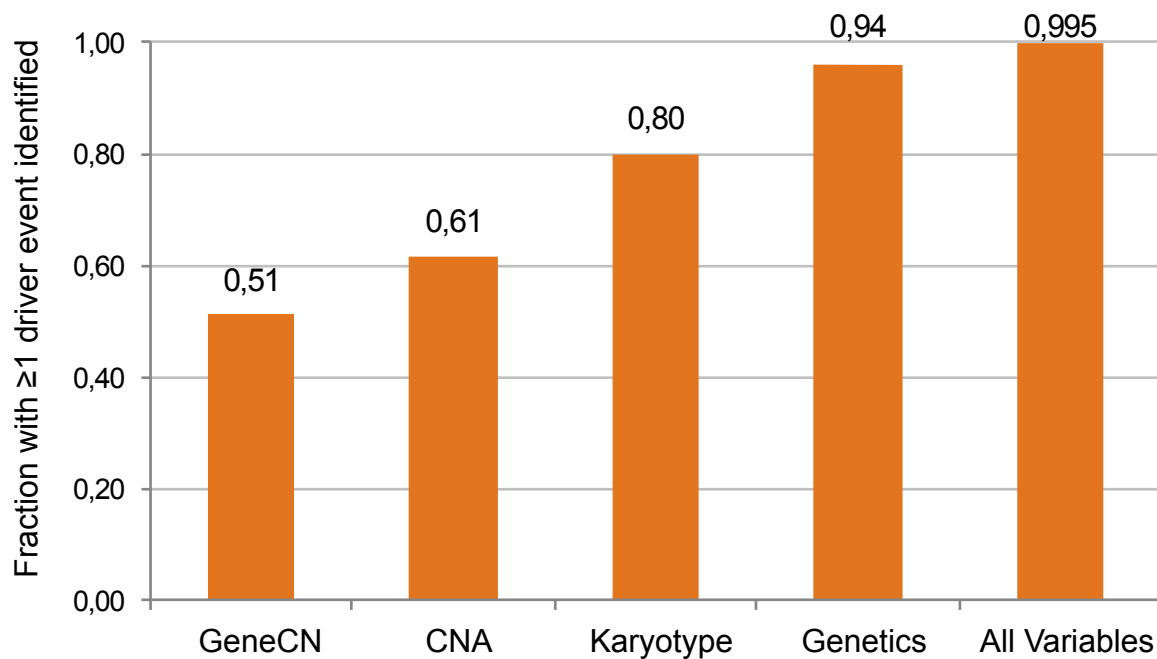

## B

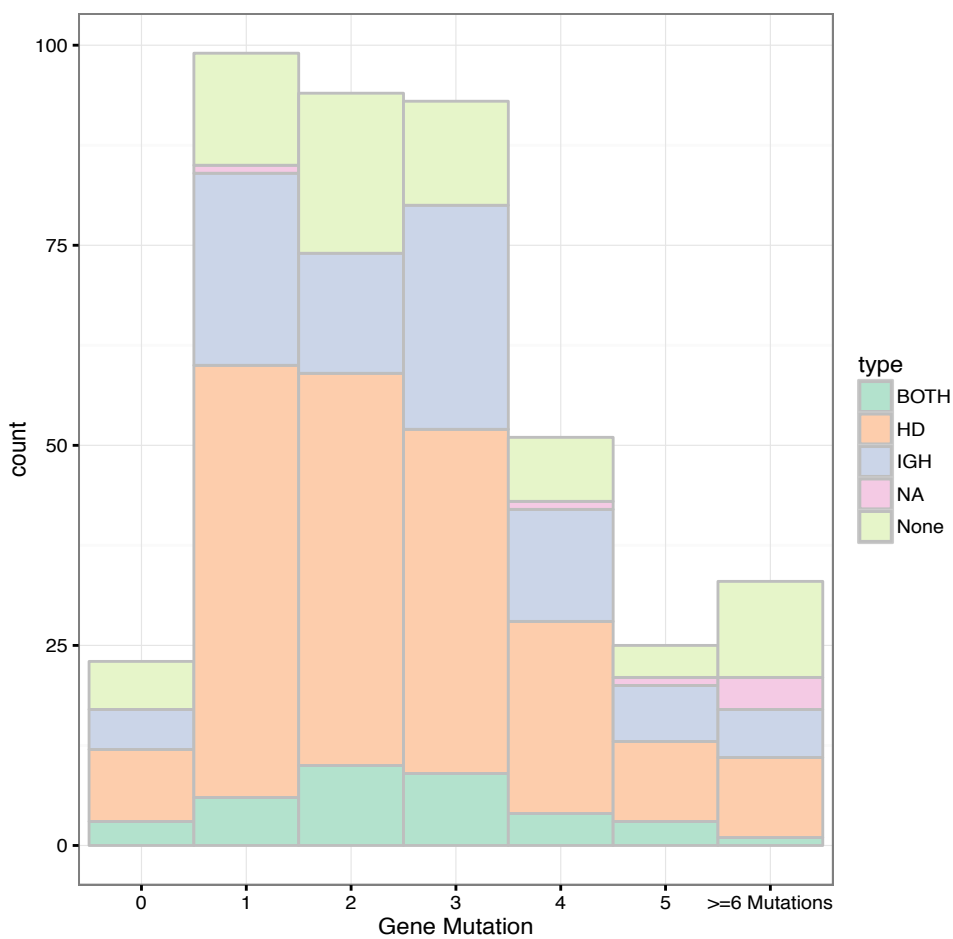

Supplement: 41375_2018_37_MOESM4_ESM.pdf [file 41375_2018_37_MOESM4_ESM.pdf]

# SUPPLEMENTARY FIGURE 4

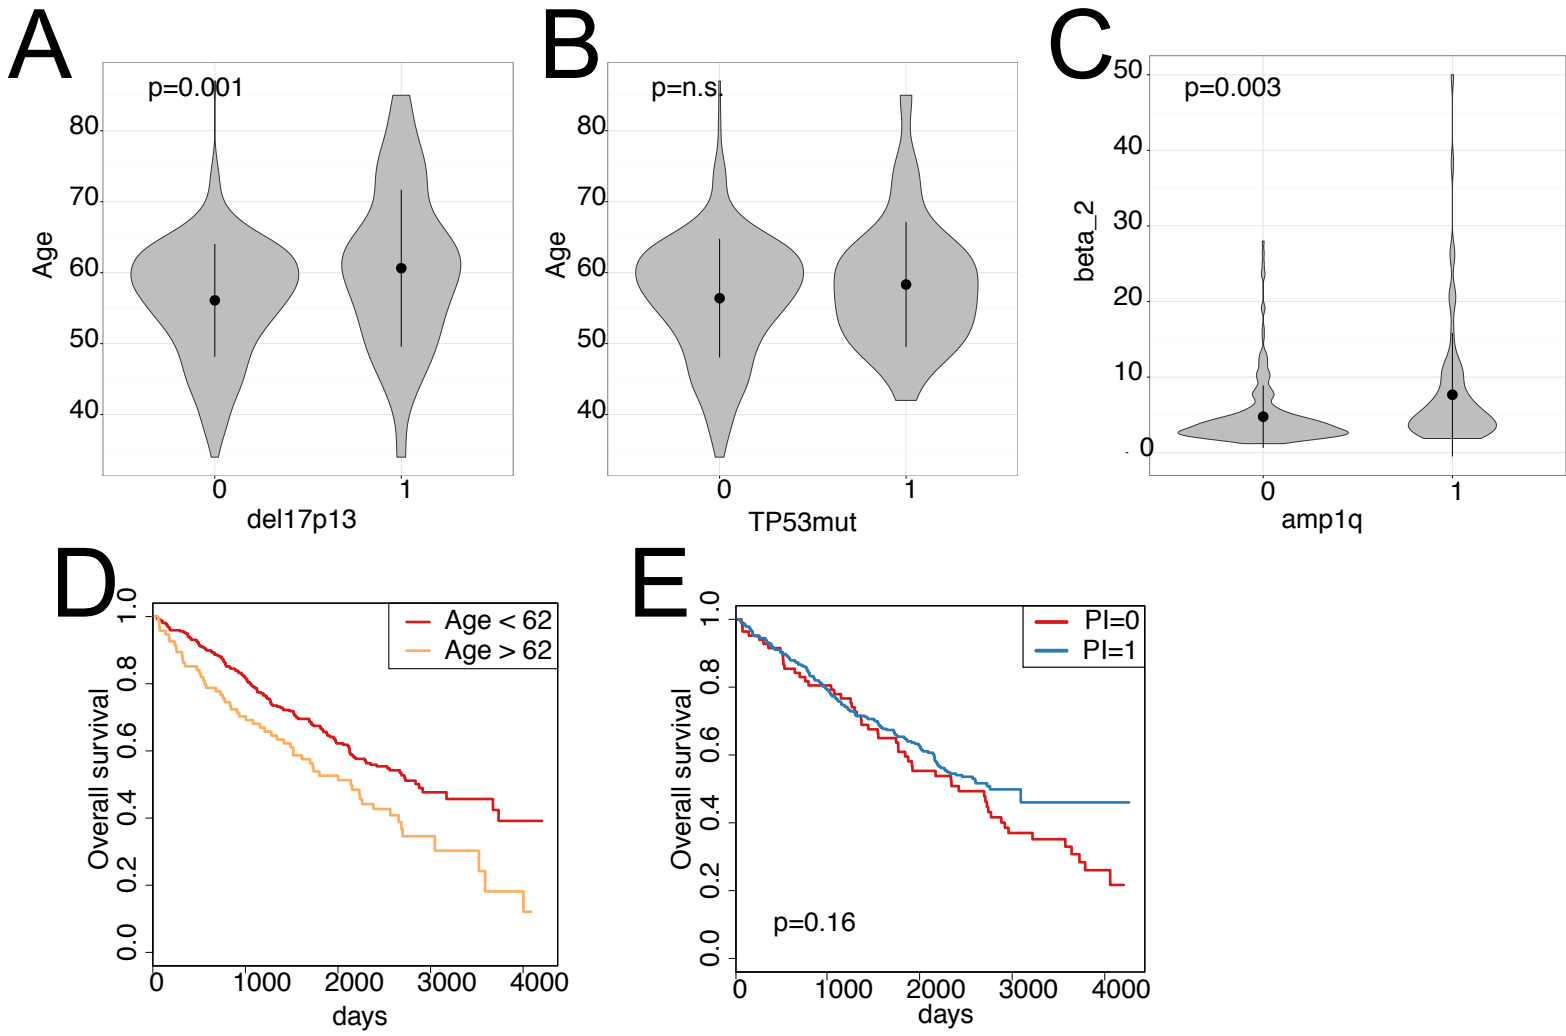

Supplement: 41375_2018_37_MOESM5_ESM.pdf [file 41375_2018_37_MOESM5_ESM.pdf]

# SUPPLEMENTARY FIGURE 5

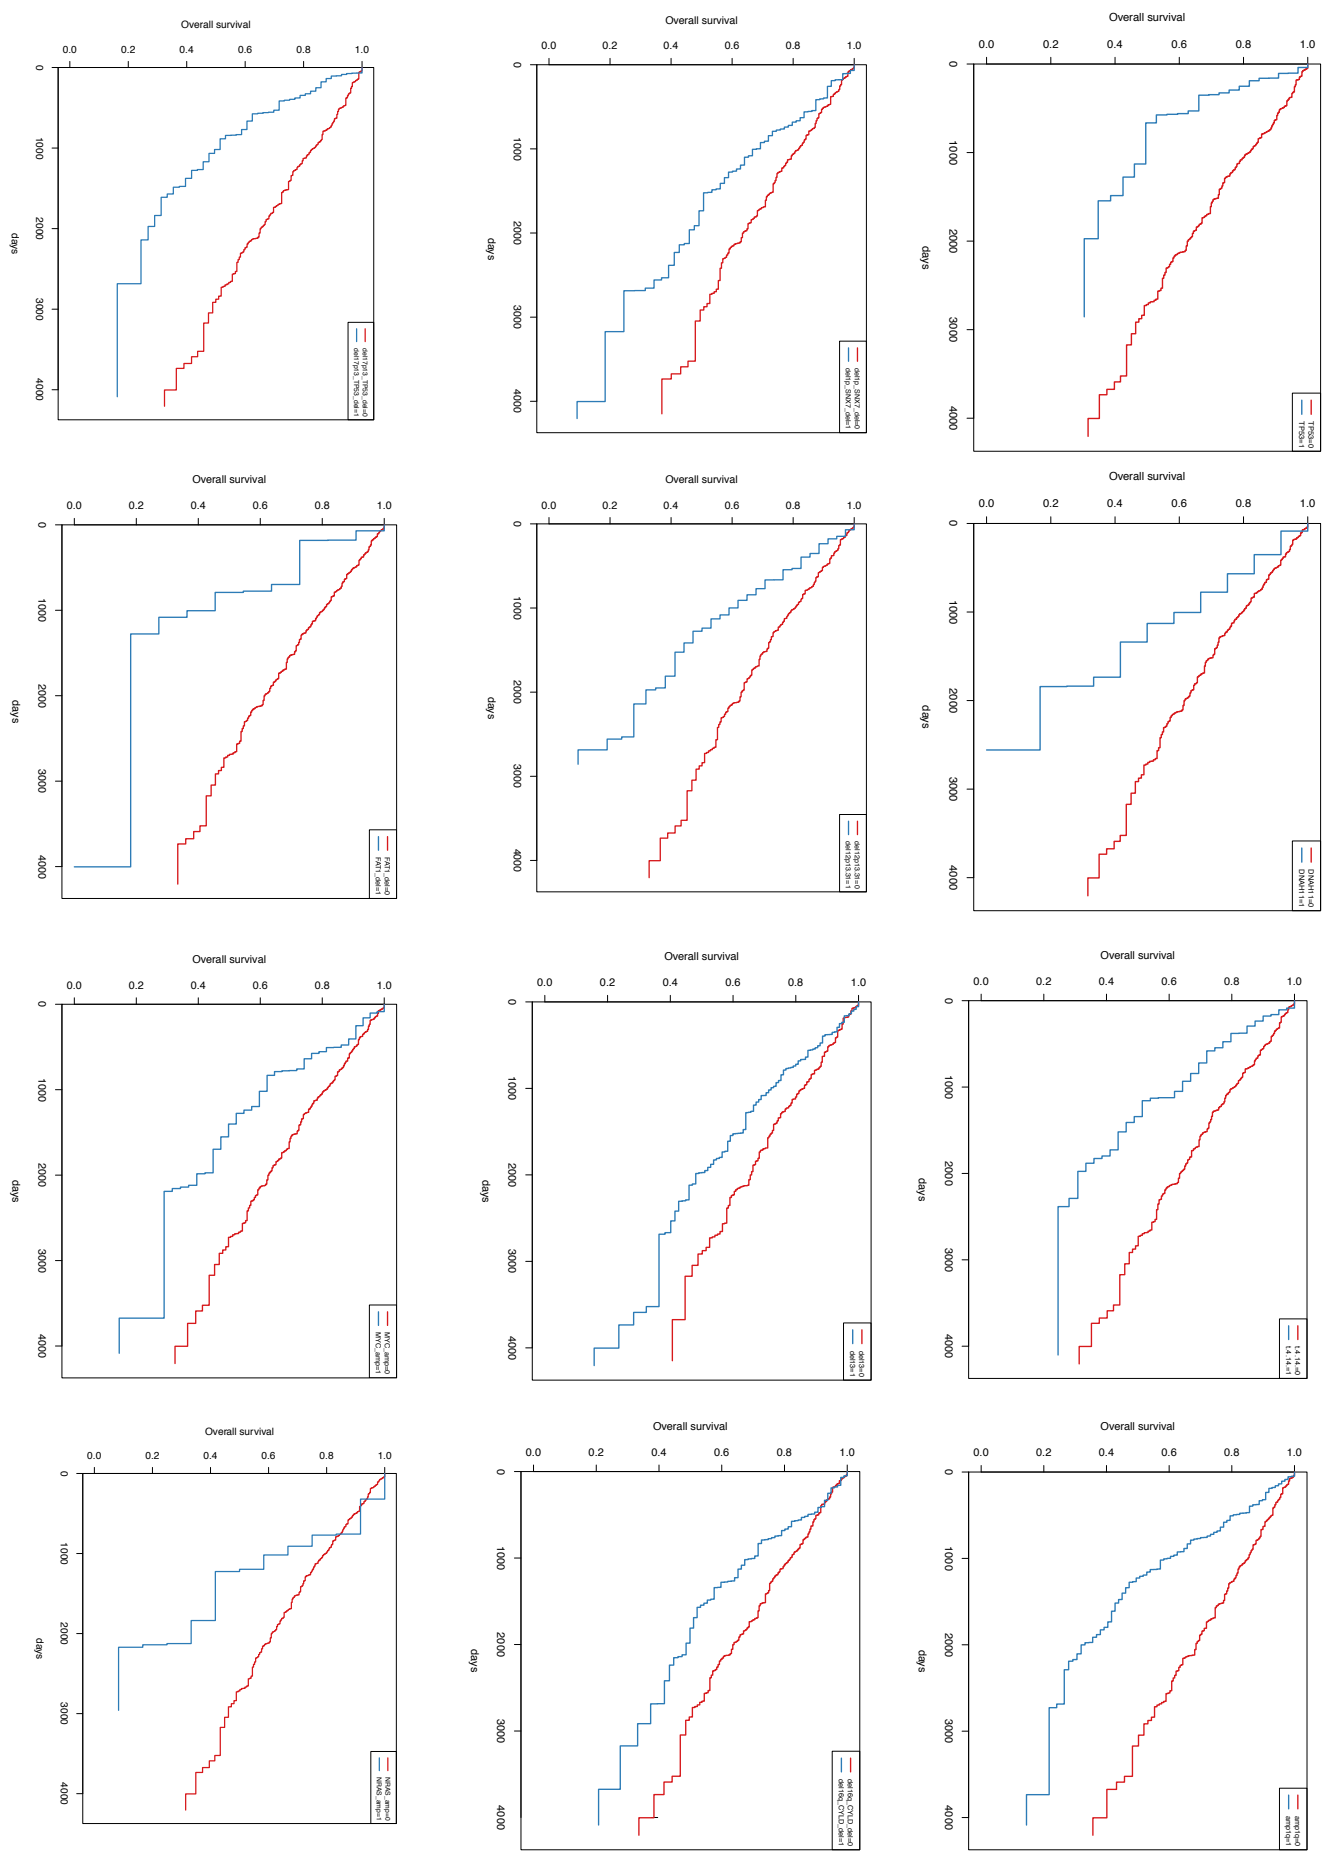

Supplement: 41375_2018_37_MOESM6_ESM.pdf [file 41375_2018_37_MOESM6_ESM.pdf]

# SUPPLEMENTARY FIGURE 6

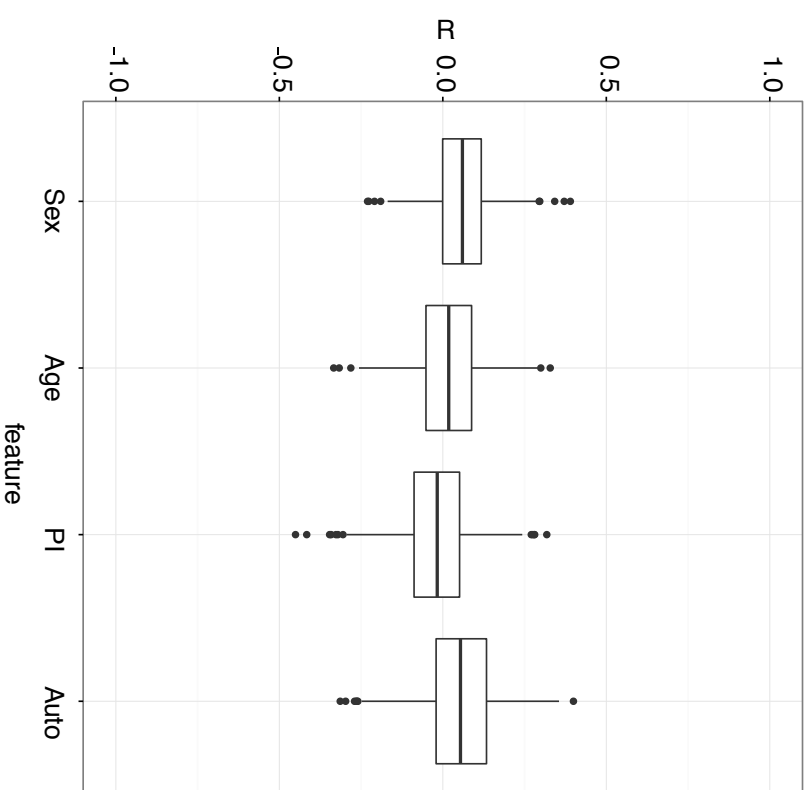

Supplement: 41375_2018_37_MOESM7_ESM.pdf [file 41375_2018_37_MOESM7_ESM.pdf]

# SUPPLEMENTARY FIGURE 7

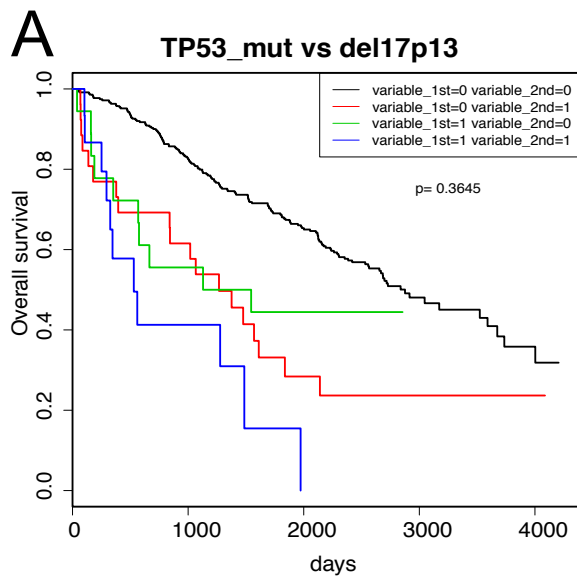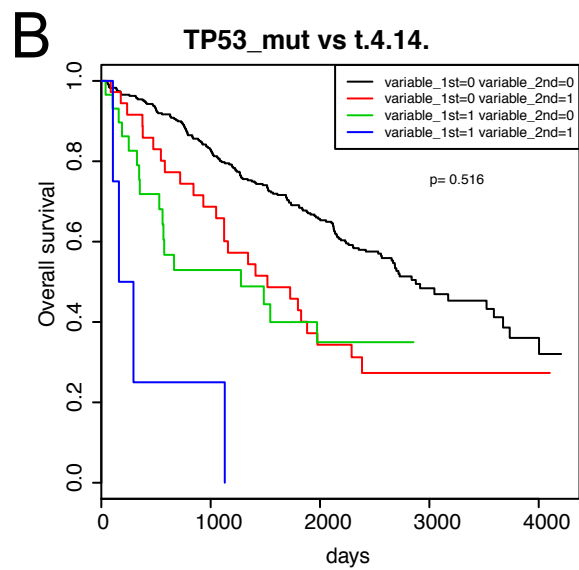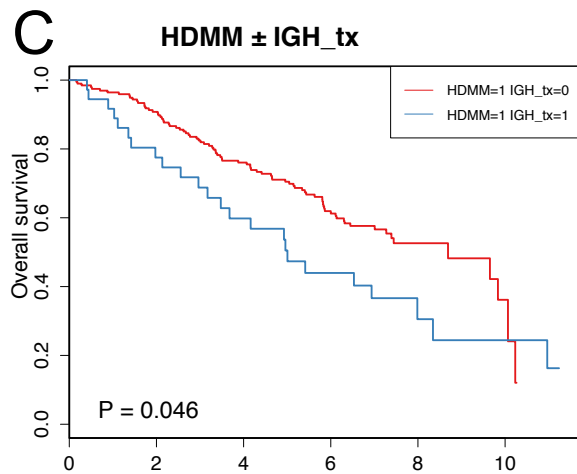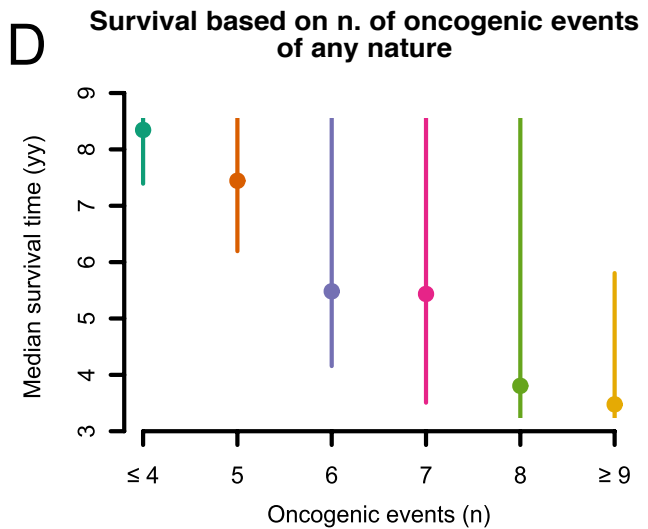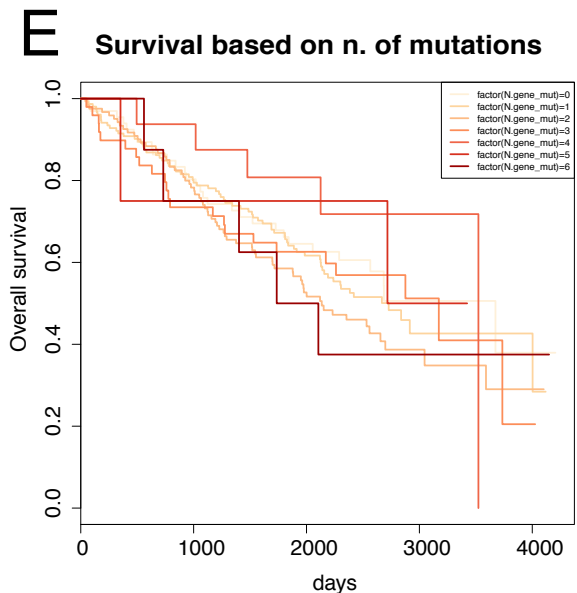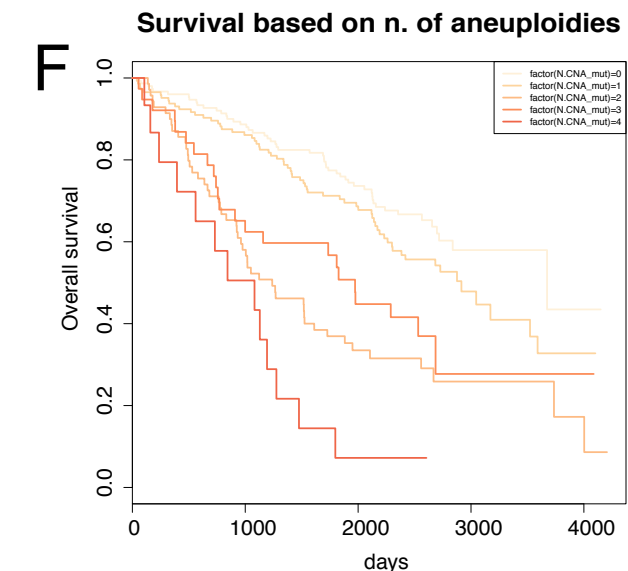

Supplement: 41375_2018_37_MOESM8_ESM.pdf [file 41375_2018_37_MOESM8_ESM.pdf]

# A

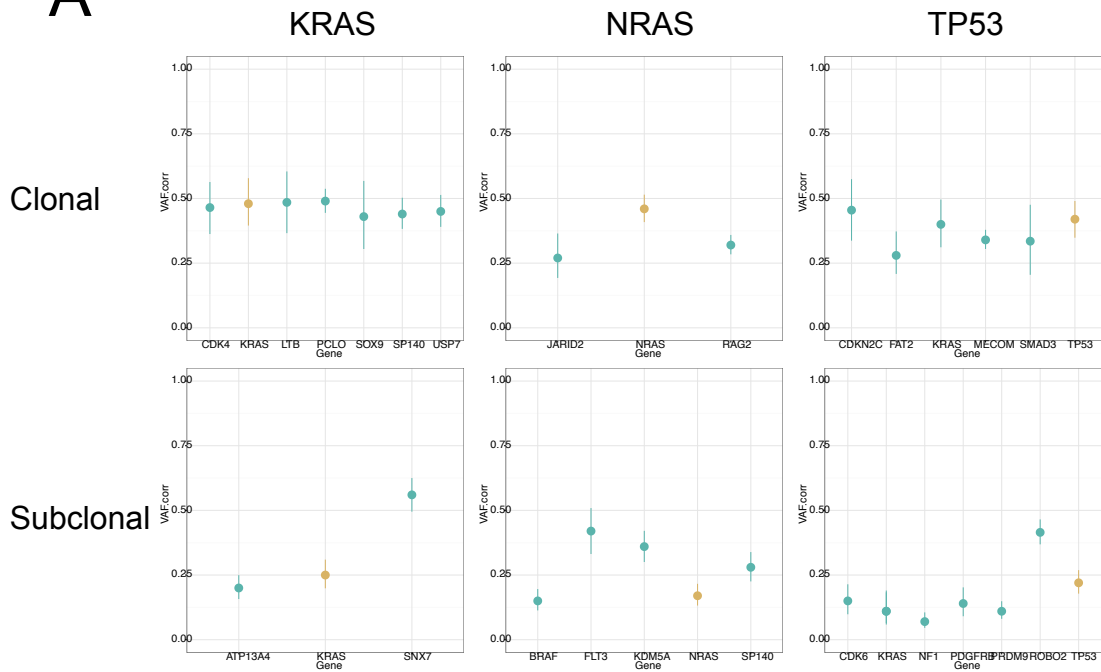

# B

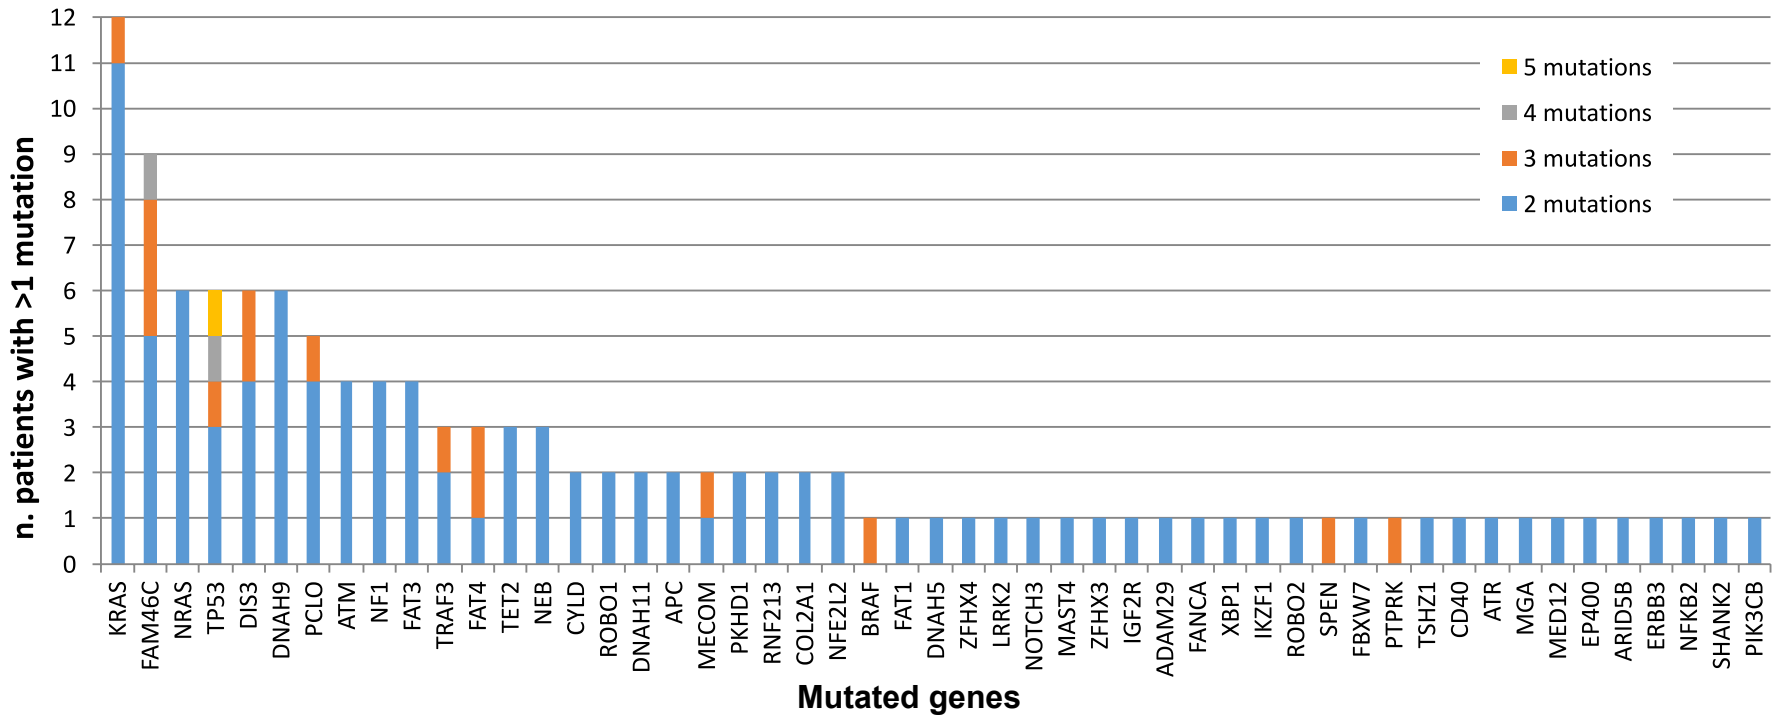

Supplement: 41375_2018_37_MOESM9_ESM.pdf [file 41375_2018_37_MOESM9_ESM.pdf]
